# Supplementary material for: Malignancy in Abdominal Wall Endometriosis: Is There a Way to Avoid It? A Systematic Review
Source: MDPI journal article supplement (doi:10.3390/jcm13082282), 2024-04-15
Supplement: s1 [file s1]

Supplementary Table S1. Summary of studies included in the review

| ID | Authors, year         | Age | Delay (years) | Previous gynecological surgery                                                           | Pre-existing endometriosis | Tumor histology           | Symptoms                     | Tumor size (cm) | Diagnosis   | IMAGING Appearance                     | Lymph nodes (pre-surgery) | CA125  | Surgical resection extent                                                          | Lymph nodes (post-surgery) | Chemotherapy regimen                       | Radiation regimen                      | recurrence | Time to / location of recurrence | Time (months)         | Follow-up (months) | Patient outcomes |            |
|----|-----------------------|-----|---------------|------------------------------------------------------------------------------------------|----------------------------|---------------------------|------------------------------|-----------------|-------------|----------------------------------------|---------------------------|--------|------------------------------------------------------------------------------------|----------------------------|--------------------------------------------|----------------------------------------|------------|----------------------------------|-----------------------|--------------------|------------------|------------|
| 1  | Achach, 2008 [64]     | 49  | 20            | Myomectomy                                                                               | NA                         | CCC                       | Pain, Mass                   | 8               | CT          | Heterogeneous mass                     | NA                        | NA     | LR                                                                                 | Neg                        | None                                       | Cyclophosphamide + Cisplatin           | Yes        | Yes                              | Bladder, pelvic bones |                    | NA               | Recurrence |
| 2  | Alberto, 2006 [43]    | 38  | 11            | 1 C/S + HRT, SOT for endometriosis                                                       | Yes                        | CCC                       | Pain                         | 5               | US, MRI     | Cystic                                 | NA                        | Normal | LR                                                                                 | Neg                        | None                                       | Taxol + Carboplatin                    | Yes        |                                  |                       |                    | NA               | NA         |
| 3  | Aust, 2015 [65]       | 47  | 16            | 1 C/S + HRT                                                                              | No                         | CCC                       | Mass                         | 10              | CT, PET CT  | NA                                     | Pelvic                    | 72     | LR + SOT + LNR (pelvic and para-aortal lymphadenectomy ) + omentactomy             | Pos                        | 2/48 lymph nodes +                         | Taxol + Carboplatin                    | No         |                                  |                       | 10                 | NED              |            |
| 4  | Bahall, 2022 [66]     | 57  | 29            | 2 C/S + 1 hysterectomy                                                                   | Yes                        | CCC                       | Pain                         | 15              | CT          | Heterogeneous mass                     | Pelvic                    | NA     | LR + SOT + LNR (pelvic lymph node sampling)                                        | Neg                        | None                                       | Taxol + Carboplatin                    | No         | Yes                              | Inguinal lymph nodes  |                    | NA               | Recurrence |
| 5  | Bahall, 2022 [66]     | 46  | 10            | 1 laparoscopic ovarian drilling                                                          | Yes                        | CCC                       | Pain                         | 10              | CT          | NA                                     | AW                        | 1200   | LR + HRT + SOT + LNR (8 AW)                                                        | Pos                        | 8/8 +                                      | Taxol + Carboplatin                    | No         |                                  |                       | 32                 | NED              |            |
| 6  | Bats, 2008 [52]       | 38  | 13            | 1 C/S                                                                                    | Yes                        | CCC                       | Mass                         | 11              | CT, MRI     | Solid Cystic                           | NA                        | NA     | LR (2 mm margin) + HRT + SOT+ omentectomy + pelvic samples                         |                            | /                                          | Taxol + Carboplatin                    | No         | Yes                              | Iliac lymph node      |                    | 8                | Recurrence |
| 7  | Behbehani, 2020 [67]  | 48  | 5             | C/S + supracervical HRT + bladder resection in endometriosis treatment                   | Yes                        | CCC                       | Mass                         | 6               | MRI         | Solid Cystic                           | NA                        | NA     | LR (tumour margins neg) + bladder excision + SOT                                   |                            | /                                          | Doxorubicine + Gemcitabine             | No         |                                  |                       |                    | NA               | NA         |
| 8  | Bedell, 2020 [31]     | 55  | 18            | 1 C/S                                                                                    | No                         | High grade Adenocarcinoma | Syncopal episode             | 6,5             | CT, PET CT  | Lobulated soft tissue mass             | Inguinal + Pelvic         | 17,2   | LR + rectus muscle + LNR (inguinal, pelvic, para.aortic) + HRT + SOT + omentectomy | Pos                        | 2/2 right inguinal + , 1/14 pelvic+        | Taxol + Carboplatin                    | Yes        |                                  |                       | 8                  | NED              |            |
| 9  | Bourdel, 2010 [58]    | 43  | 20            | 2 C/S + 1 endometriosis excision                                                         | Yes                        | CCC                       | Mass                         | 9               | MRI         | Heterogeneous mass                     | Pelvic                    | 43,8   | LR + umbilicus +HRT + SOT + LNR bilat external Pelvic)                             | Pos                        | 1 right Pelvic + , multiples left Pelvic + | Taxol + Carboplatin                    | Yes        | Yes                              | 6 / lymph nodes       | 6                  | 22               | DOD        |
| 10 | Castagnino, 2021 [28] | 49  | 20            | 1 C/S                                                                                    | No                         | CCC                       | Pain, Mass                   | 25              | MRI, PET CT | Polylobulated mass                     | Pelvic + Inguinal         | 49,8   | LR (free margins) + HRT + SOT +LNR (bilateral Pelvic + inguinal)                   | Pos                        | bilateral Pelvic + inguinal+               | Yes                                    | No         |                                  |                       |                    | NA               | NA         |
| 11 | Da Ines, 2010 [68]    | 48  | 20            | 2 C/S                                                                                    | Yes                        | EC + SPC                  | Pain                         | 6               | MRI         | Solid Cystic<br>Iso T1 W<br>Hyper T2 W | None                      | Normal | LR + HRT + SOT + LNR (left Pelvic)                                                 | Pos                        | 2/2 left Pelvic                            | Taxol + Carboplatin                    | No         |                                  |                       |                    | 15               | NED        |
| 12 | Dobrosz, 2014 [69],   | 42  | NA            | 1 C/S                                                                                    | NA                         | CCC                       | Pain                         | NA              | US          | NA                                     | None                      | NA     | LR + enodmetrial biopsy                                                            | Neg                        | None                                       | No                                     | No         |                                  |                       |                    | NA               | NED        |
| 13 | Drukala, 2010 [70]    | 43  | 17            | 1 C/S                                                                                    | NA                         | EC                        | Pain                         | NA              | NA          | NA                                     | NA                        | High   | LR + HRT                                                                           | Neg                        | None                                       | Cisplatin + Etoposide + 5-fluorouracil | Yes        | Yes                              | 48 / inguinal nodes   | 48                 | 130              | DOD        |
| 14 | Fabregas, 2014 [71]   | 49  | 15            | 1 C/S + 1 endometriosis excision                                                         | Yes                        | SPC                       | Pain, Mass                   | 7               | US          | NA                                     | None                      | 243    | LR + HRT + SOT + LNR (Pelvic)                                                      | Pos                        | 2 right + 1 left Pelvic                    | Taxol + Carboplatin                    | No         |                                  |                       |                    | 48               | NED        |
| 15 | Ferrandina, 2016 [24] | 44  | 9             | 1 C/S                                                                                    | No                         | CCC                       | Abdominal bloating, Swelling | 22              | MRI, PET CT | Solid                                  | Pelvic + Inguinal         | Normal | LR + removal of rectus + HRT+ SOT + LNR (inguinal + pelvic)                        | Pos                        | 7/14 pelvic, 8/11 inguinal                 | Taxol + Carboplatin                    | No         | Yes                              | 1 / NA                | 1                  | 6                | DOD        |
| 16 | Ferrari, 2021 [72]    | 46  | 12            | 1 C/S, Resection of endometriomas laparoscopy, HRT + bilateral salpingectomy laparoscopy | Yes                        | CCC                       | Pain, Mass                   | 5               | US MRI      | Hypo T1 W<br>Hyper T2 W                | NA                        | 33     | LR+ Bilateral Ovariectomy                                                          | Neg                        | None                                       | No                                     | No         |                                  |                       |                    | 4                | NED        |

| ID | Authors, year         | Age | Delay (years) | Previous gynecological surgery                                                 | Pre-existing endometriosis | Tumor histology       | Symptoms         | Tumor size (cm) | Diagnosis   | IMAGING Appearance             | Lymph nodes (pre-surgery)                                  | CA125  | Surgical resection extent                                           | Lymph nodes (post-surgery) | Chemotherapy regimen                        | Radiation regimen                                   | recurrence | Time to / location of recurrence | Time (months)                                         | Follow-up (months) | Patient outcomes |             |
|----|-----------------------|-----|---------------|--------------------------------------------------------------------------------|----------------------------|-----------------------|------------------|-----------------|-------------|--------------------------------|------------------------------------------------------------|--------|---------------------------------------------------------------------|----------------------------|---------------------------------------------|-----------------------------------------------------|------------|----------------------------------|-------------------------------------------------------|--------------------|------------------|-------------|
| 17 | Gentile, 2018 [101]   | 42  | 7             | 1 C/S + 1 local resection of endometriosis of the cephalic scar (Pfannenstiel) | Yes                        | CCC + EC              | Pain, Mass       | 10              | CT          | Heterogeneous mass             | NA                                                         | Normal | LR + LNR (inguinal + Pelvic)                                        | Pos                        | 1/8 Pelvic , 0/11 inguinal                  | Yes                                                 | NA         |                                  |                                                       | 2                  | NED              |             |
| 18 | Giannella, 2020 [25]  | 45  | 22            | 2 C/S                                                                          | No                         | CCC                   | Pain, Mass       | 20              | CT, MRI     | Solid Lacunar aeras            | Pelvic + Liver Pulmonary Metastasis                        | NA     | None                                                                |                            | Taxol + Carboplatin after Gemcitabine       | No                                                  | Yes        | 2 / lung, bones, local           | 2                                                     | 7                  | DOD              |             |
| 19 | Fodor, 2017 [73]      | NA  | NA            | 1 C/S                                                                          | NA                         | CCC                   | Pain, Mass       | 5               | US          | Solid Cystic                   | Not evaluated                                              | Normal | LR (no free margins, re-operated)                                   | Neg                        | None                                        | No                                                  |            |                                  |                                                       | 6                  | NED              |             |
| 20 | Gücer, 1997 [99]      | 45  | 8             | 1 C/S + HRT                                                                    | NA                         | EC                    | Pain             | NA              | NA          |                                | NA                                                         | NA     | LR + ovaries                                                        | Neg                        | None                                        | Carboplatine + Cyclophosphamide                     | Yes        | NA                               | NA                                                    | 20                 | DOD              |             |
| 21 | Han, 2022 [74]        | 54  | 31            | 1 C/S + laparoscopy for endometrial cyst                                       | Yes                        | EC                    | Mass             | 3               | US, PET CT  | Cystic                         | right Inguinal, Pelvic, retrodiaphragmatic retroperitoneal | 48     | LR and then HRT + SOT + LNR (pelvic)                                | Pos                        | right pelvic and inguinal+                  | Doxorubicin + Carboplatin                           | No         |                                  |                                                       | 16                 | NED              |             |
| 22 | Harry, 2007 [100]     | 55  | 30            | Open sterilization                                                             | No                         | CCC                   | Pain             | 4               | CT          |                                | Not evaluated                                              | 9      | LR                                                                  |                            | Not evaluated                               | No                                                  | Yes        |                                  |                                                       | 18                 | NED              |             |
| 23 | Heller, 2014 [102]    | 37  | NA            | 3 C/S                                                                          | NA                         | CCC                   | Mass             | NA              | NA          |                                | NA                                                         | NA     | LR + left SOT+ LNR (pelvic)                                         | Pos                        | bilateral pelvic +                          | No                                                  | No         |                                  |                                                       | 5                  | NA               |             |
| 24 | Hitti, 1990 [21]      | 46  | 14            | 2 C/S                                                                          | Yes                        | CCC                   | Pain             | 6               | NA          | NA                             | None                                                       | NA     | LR + HRT + SOT + sigmoidectomy + colectomy                          | Neg                        | None                                        | No                                                  | No         |                                  |                                                       | 30                 | NED              |             |
| 25 | Ishida, 2002[27]      | 56  | 20            | 2 C/S                                                                          | NA                         | CCC                   | Mass             | NA              | CT          | NA                             | Not evaluated                                              | Normal | LR                                                                  |                            | Not evaluated                               | Cisplatin                                           | No         | Yes                              | Bone, brain, lung                                     | 24                 | DOD              |             |
| 26 | Karpathiou, 2021 [75] | 55  | 25            | 2 C/S                                                                          | No                         | EC                    | Mass             | 6               | US, PET CT  | NA                             | None                                                       | NA     | LR (free margins)                                                   | Neg                        | None                                        | Carboplatin + Plaxitel                              | Yes        |                                  |                                                       | 24                 | NED              |             |
| 27 | Ji, 2017 [76]         | 48  | 15            | 1 C/S                                                                          | Yes                        | Serous adenocarcinoma | Pain, Mass       | 15              | CT, MRI, US | Hyper T1 W Hyper T2 W          | inguinal                                                   | 715    | LR + SOT + HRT + omentectomy + LNR (pelvic+ para aortic + inguinal) | Pos                        | 11/18 pelvic, 1/9 para aortic, 2/5 inguinal | Taxol + Carboplatin after Gemcitabine               | No         | NA                               | NA                                                    | 7                  | Recurrence       |             |
| 28 | Klein, 1999 [26]      | 67  |               | no                                                                             | No                         | CCC                   | Mass             | 16,5            | CT, MRI     | Heterogeneous mass, Hyper T2 W | None                                                       | Normal | LR + HRT+ SOT+ liver biopsy                                         | Neg                        | None                                        | No                                                  | Yes        | Yes                              | 25 / local recurrence                                 | 25                 | 50               | NED         |
| 29 | Lai, 2019 [34]        | 52  | 19            | 1 C/S                                                                          | No                         | CCC                   | Mass, Ulceration | 17,5            | CT          | NA                             | None                                                       | 20,1   | LR( free margins 2 cm)+ HRT + SOT                                   | Neg                        | None                                        | No                                                  | No         | Yes                              | 10/ inguinal node, bone                               | 10                 | 14               | Recurrence  |
| 30 | Lai, 2019 [34]        | 56  | 33            | 1 C/S                                                                          | No                         | CCC                   | Mass             | 6,5             | CT          | NA                             | Pelvic                                                     | 22,3   | LR (free margins 2 cm) + SOT+ HRT+ omentectomy+ LNR (pelvic)        | Pos                        | right pelvic                                | Taxol + Carboplatin                                 | No         | Yes                              | 3 / inguinal node                                     | 3                  | 11               | NED         |
| 31 | Lai, 2019 [34]        | 56  | 24            | 1 C/S                                                                          | No                         | CCC                   | Mass             | 12              | CT          | Heterogeneous mass             | None                                                       | 23     | LR (free margins 2cm) + HRT + SOT + LNR (pelvic)                    | Neg                        | None                                        | Taxol + Carboplatin                                 | No         |                                  |                                                       |                    | 5                | NED         |
| 32 | Lai, 2019 [347]       | 55  | 24            | 1 C/S                                                                          | Yes                        | CCC                   | Mass             | 12,5            | CT          | NA                             | None                                                       | 26,7   | LR (no free margins) + HRT + SOT + omentectomy                      | Neg                        | None                                        | Gemcitabine + Carboplatin + Bavacizumab             | No         | Yes                              | Abdominal wall, inguinal node, neck node, liver, lung |                    | 23               | DOD         |
| 33 | Lai, 2019 [34]        | 45  | 20            | 1 C/S                                                                          | No                         | CCC                   | Mass, Ulceration | 4,8             | CT          | NA                             | None                                                       | 38,9   | None                                                                | Neg                        | None                                        | Taxol + Carboplatin after Doxorubicin + Carboplatin | Yes        | Yes                              | Abdominal wall, inguinal node                         |                    | 7                | Progression |

|    |                 |    |    |                                   |     |              |      |    |        |              |      |      |                                   |     |      |                        |    |     |                  |  |    |     |
|----|-----------------|----|----|-----------------------------------|-----|--------------|------|----|--------|--------------|------|------|-----------------------------------|-----|------|------------------------|----|-----|------------------|--|----|-----|
| 34 | Lai, 2019 [34]  | 52 | 4  | Left oophorectomy                 | Yes | CCC          | Mass | 7  | CT     | NA           | None | 38,5 | LR (free margins 2cm) + HRT + SOT | Neg | None | Taxol + Carboplatin    | No |     |                  |  | 97 | NED |
| 35 | Leng, 2006 [11] | 41 | 16 | 1 C/S + 3 endometriosis resection | Yes | Sarcoma + EC | Pain | 10 | Biopsy | Solid Cystic | NA   | NA   | LR (5mm free margin) + HRT + SOT  | Neg | None | Cisplatin + Ifosfamide | No | Yes | Local recurrence |  | 15 | DOD |

Supplementary Table S1. (continued)

Supplementary Table S2: (continued)

| ID | Authors, year           | Age | Delay (years) | Previous gynecological surgery              | Pre-existing endometriosis | Tumor histology | Symptoms                           | Tumor size (cm) | Diagnosis       | IMAGING Appearance                 | Lymph nodes (pre-surgery) | CA125  | Surgical resection extent                                                             | Lymph nodes (post-surgery) | Chemotherapy regimen                                  | Radiation regimen                    | recurrence | Time to / location of recurrence | Time (months)                 | Follow-up (months) | Patient outcomes |            |
|----|-------------------------|-----|---------------|---------------------------------------------|----------------------------|-----------------|------------------------------------|-----------------|-----------------|------------------------------------|---------------------------|--------|---------------------------------------------------------------------------------------|----------------------------|-------------------------------------------------------|--------------------------------------|------------|----------------------------------|-------------------------------|--------------------|------------------|------------|
| 36 | Lewis, 2022 [77]        | 54  | 22            | 1 C/S                                       | Yes                        | CCC             | Pain, Mass                         | 6               | CT, MRI, US     | NA                                 | Pelvic + Inguinal         | 45     | LR (neg margins) + HRT + SOT + omentectomy + LNR(right inguinal + pelvic + Pelvic )   | Pos                        | 2/4 right inguinal +2/5(obturator) pelvic +0/5 Pelvic | Carboplatin + Plaxitel + trastuzumab | No         |                                  |                               | 9                  | NED              |            |
| 37 | Li, 2019 [59]           | 49  | 26            | 1 C/S, cholecystectomy, splenectomy         | No                         | CCC             | Pain                               | 8,2             | CT              | NA                                 | None                      | 57,1   | LR + SOT + HRT                                                                        | Neg                        | None                                                  | Taxol + Carboplatin                  | No         |                                  |                               | 8                  | NED              |            |
| 38 | Ijichi, 2014 [57]       | 60  | 35            | 2 C/S                                       | NA                         | CCC             | Mass                               | 4               | MRI             | Solid Cystic                       | None                      | Normal | LR                                                                                    |                            | Not evaluated                                         | No                                   | No         | Yes                              | c/s scar                      | 8                  | Recurrence       |            |
| 39 | Liu, 2021 [14]          | 48  | 22            | 1 C/S                                       | Yes                        | CCC             | Pain, Mass                         | 13              | CT, MRI, Biopsy | Cystic, solid Hypo T1 W Hyper T2 W | None                      | 164,7  | LR + SOT + HRT                                                                        | Neg                        | None                                                  | Cisplatin                            | Yes        |                                  |                               | 12                 | NED              |            |
| 40 | Fargas, 2014 [71]       | 39  | 20            | 1 C/S                                       | Yes                        | CCC             | Pain, Mass                         | 6               | CT              | NA                                 | Inguinal                  | 22,1   | LR + bladder excision + LRT + SOT + omentectomy + LNR (pelvic , para aort , inguinal) | Pos                        | 8/8 inguinal, 18/21 pelvic, 6/6 para aortic           | Taxol + Carboplatin                  | No         | Yes                              | Local recurrence              | 12                 | DOD              |            |
| 41 | Lopes, 2019 [78]        | 48  | 30            | 1 C/S                                       | Yes                        | CCC             | Mass                               | 12              | CT, MRI         | Solid                              | Pelvic + inguinal         | 3157   | LR + HRT + SOT + LNR (inguinal, pelvic , para aortic) + omentectomy                   | Pos                        | 2/9 inguinal, 2/20 right pelvic 1/24 left pelvic      | NA                                   | NA         |                                  |                               | NA                 | NED              |            |
| 42 | Markopoulos, 1996 [103] | 40  | 25            | 2 C/S                                       | No                         | EC              | Pain                               | NA              | NA              |                                    | NA                        | NA     | HRT + SOT                                                                             |                            | Not evaluated                                         | No                                   | No         |                                  |                               | 24                 | NED              |            |
| 43 | Marques, 2017 [79]      | 47  | 30            | 3 C/S                                       | NA                         | CCC             | Pain, Mass                         | 8               | CT              | Heterogeneous mass                 | None                      | 29     | LR (free margin) + SOT after: HRT                                                     | Neg                        | None                                                  | Taxol + Carboplatin                  | No         | Yes                              | 9 / local                     | 9                  | 36               | NED        |
| 44 | Matsuo, 2008 [5]        | 37  | NA            | Laparotomy for endometrioma resection       | Yes                        | CCC             | Pain, Abdominal bloating, Swelling | 14              | MRI             | Cystic                             | None                      | NA     | LR + HRT + SOT+ LNR (pelvic) + omentectomy                                            | Neg                        | None                                                  | Docetaxel + Carboplatin              | No         | Yes                              | 18 / local recurrence + bowel | 18                 | 18               | Recurrence |
| 45 | Matter, 2003 [12]       | 60  | 41            | 2 C/S                                       | No                         | EC              | Pain                               | 8               | CT, MRI         | NA                                 | None                      | Normal | LR                                                                                    | Neg                        | None                                                  | No                                   | No         |                                  |                               | 18                 | NED              |            |
| 46 | Mert, 2012 [80]         | 42  | NA            | 2 C/S+ tubal ligation                       | NA                         | CCC             | Mass                               | 17              | CT              | NA                                 | None                      | Normal | LR + HRT + SOT + omentectomy + LNR (pelvic)                                           | Neg                        | None                                                  | Taxol + Carboplatin                  | No         |                                  |                               | 26                 | NED              |            |
| 47 | Mert, 2012 [80]         | 51  | 18            | 2 C/S + HRT                                 | Yes                        | CCC             | Mass                               | 7               | CT              | NA                                 | NA                        | NA     | LR + SOT + omentectomy                                                                | Neg                        | None                                                  | No                                   | Yes        |                                  |                               | 31                 | NED              |            |
| 48 | Mihailovici, 2017 [9]   | NA  | NA            | 1 C/S                                       | NA                         | CCC             | Pain, Abdominal bloating, Swelling | 9               | CT, US, PET CT  | Solid Heterogeneous mass           | Inguinal                  | Normal | LR + SOT + HRT                                                                        |                            | /                                                     | Platinumium                          | Yes        |                                  |                               | NA                 | NA               |            |
| 49 | Miller, 1997 [81]       | 38  | 9             | 1 C/S                                       | Yes                        | CCC             | Pain                               | 4               | CT, US          | NA                                 | None                      | 35     | LR, then HRT + SOT + omentum                                                          | Neg                        | None                                                  | Cisplatin                            | Yes        |                                  |                               | 60                 | NED              |            |
| 50 | Obata, 2013 [82]        | 60  | 12            | HRT                                         | No                         | CCC             | Bleeding                           | 3               | MRI, PET CT     | NA                                 | None                      | NA     | LR, SOT                                                                               | Neg                        | None                                                  | NA                                   | NA         |                                  |                               | NA                 | NA               |            |
| 51 | Omranipour, 2010 [29]   | 59  | 20            | Laparotomy for perforation during curettage | No                         | SPC             | Mass                               | 10              | CT              | Solid Cystic                       | None                      | Normal | LR + SOT + HRT                                                                        | Neg                        | None                                                  | Platinumium                          | Yes        |                                  |                               | 24                 | NED              |            |
| 52 | Park, 1999 [83]         | 54  | 26            | 2 C/S                                       | Yes                        | CCC             | Mass                               | 5               | CT              | NA                                 | not evaluated             | NA     | LR                                                                                    |                            | Not evaluated                                         | No                                   | Yes        |                                  |                               | NA                 | NA               |            |
| 53 | Paulino, 2020 [84]      | 45  | 23            | Hemicolectomy                               | No                         | EC              | Pain                               | 18              | CT              | NA                                 | Inguinal                  | NA     | LR (free margins) + HRT + SOT                                                         | Pos                        | inguinal and axillary confirmed by biopsy             | No                                   | No         |                                  |                               | 12                 | NA               |            |
| 54 | Peer, 2013 [10]         | 44  | NA            | Appendectomy                                | NA                         | EC              | Mass                               | 3               | CT, MRI, PET CT | Cystic                             | Inguinal                  | Normal | LR + LNR (right pelvic + inguinal) + curettage                                        | Pos                        | 0/12                                                  | Taxol + Carboplatin                  | Yes        |                                  |                               | 36                 | NED              |            |
| 55 | Petit, 2022 [85]        | 52  | NA            | Resection parietal endometriosis            | Yes                        | CCC             | Pain                               | 8               | US, MRI, PET CT | Cystic                             | None                      | NA     | LR + SOT + HRT                                                                        | Neg                        | None                                                  | Carboplatin-Taxol-Avastin)           | No         |                                  |                               |                    | NA               |            |
